# Supplementary material for: A lysosome-targeted triazole near-infrared cyanine fluorescent probe for in vivo long-term cell tracking
Source: Royal Society of Chemistry journal article supplement (doi:10.1039/d3an01238g), 2023-01-01
Supplement: d3an01238g1.pdf [file d3an01238g1.pdf]

Supporting information

**Lysosome-targeted triazole near-infrared cyanine fluorescent probe  
for in vivo long-term cell tracking**

Xianrong Yu<sup>a</sup>, Yu Wu<sup>b</sup>, Wei Tang<sup>\*a</sup> and Xinrui Duan<sup>\*a</sup>

a Key Laboratory of Analytical Chemistry for Life Science of Shaanxi Province  
and School of Chemistry and Chemical Engineering, Shaanxi Normal University,  
620 Xi Chang'an Street, Xi'an, Shaanxi 710119, People's Republic of China

b College of Life Science, Shaanxi Normal University, 620 Xi Chang'an Street,  
Xi'an, Shaanxi 710119, People's Republic of China.

E-mail: tangwei@snnu.edu.cn; duanxr@snnu.edu.cn

**Table of contents**

|                      |    |
|----------------------|----|
| Experimental section | S2 |
| Figure S1            | S2 |
| Figure S2-S3         | S3 |
| Figure S4-S5         | S4 |
| Figure S6-S7         | S5 |
| Figure S8            | S6 |

## Experimental section:

### Synthesis of IR780-PO-NH<sub>2</sub>

IR780-PO-NH<sub>2</sub> was synthesized mainly according to the literature.<sup>13</sup> Briefly, Boc-tyramine (113 mg, 0.476 mmol) was added into anhydrous DMF solution, and the solution was dropped into NaH (16.7 mg, 0.417 mmol) anhydrous DMF solution. This mixture solution was stirred in an ice bath for 30 min in a flask to completely dissolve. IR780 (100 mg, 0.150 mmol) was dissolved in anhydrous DMF solution and dropped into the flask under the ice water for 30 min and at room temperature for 90 min sequentially. When the reaction finished, the solution was dissolved in saturated NH<sub>4</sub>Cl solution, extracted with CH<sub>2</sub>Cl<sub>2</sub> (3×100 mL), and dried by Na<sub>2</sub>SO<sub>4</sub>. Through filtering and evaporating under reduced pressure, the crude was purified by normal-phase chromatography (CH<sub>2</sub>Cl<sub>2</sub>: MeOH = 40: 1) to yield IR780-PO-NH<sub>2</sub>-BOC as a green solid.

The above products were dissolved in 1 mL CH<sub>2</sub>Cl<sub>2</sub> and bathed in ice water for 10 min. Then, 1 mL of trifluoroacetic acid (TFA) was dropped in the CH<sub>2</sub>Cl<sub>2</sub> and stirred at room temperature for 3 h. After evaporating under reduced pressure, IR780-PO-NH<sub>2</sub> was obtained as a green solid and stored at -20°C away from light. <sup>1</sup>H NMR (600 MHz, DMSO-*d*<sub>6</sub>): δ 1.15-1.35(m, 16H), 1.65-1.75(m, 4H), 2.71(m, 4H), 2.78(m, 4H), 4.11(t, 4H), 6.22-6.24(d, 2H), 7.02-7.06(d, 2H), 7.10-7.15(m, 2H), 7.18-7.23(t, 2H), 7.26-7.28(d, 2H), 7.47-7.52(m, 2H), 7.76-7.86(m, 6H). HR-MS: calculate for C<sub>44</sub>H<sub>54</sub>N<sub>3</sub>O<sup>+</sup> m/z 640.4261, found 640.4260.

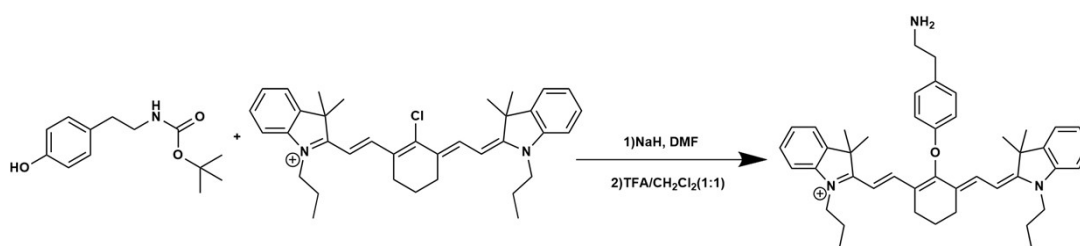

Figure S1. Synthesis route of IR780-PO-NH<sub>2</sub>

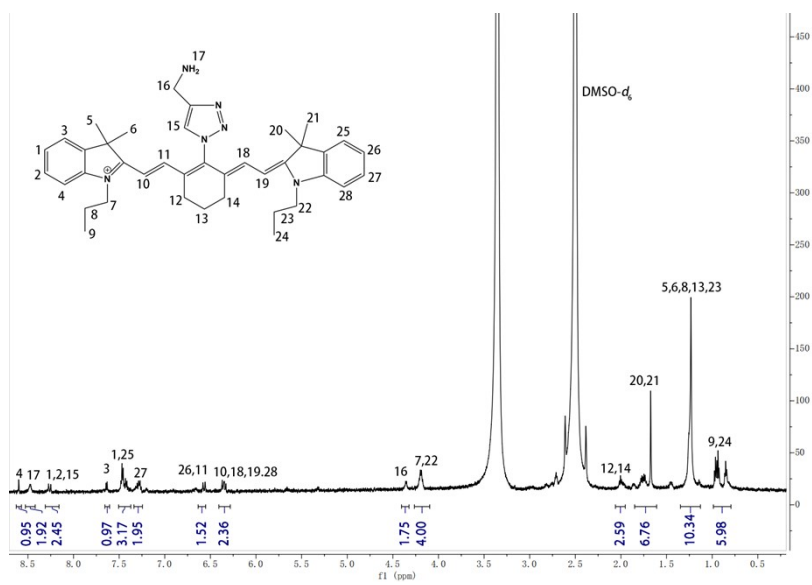

Figure S2.  $^1\text{H}$  NMR of IR780-NT-NH<sub>2</sub>

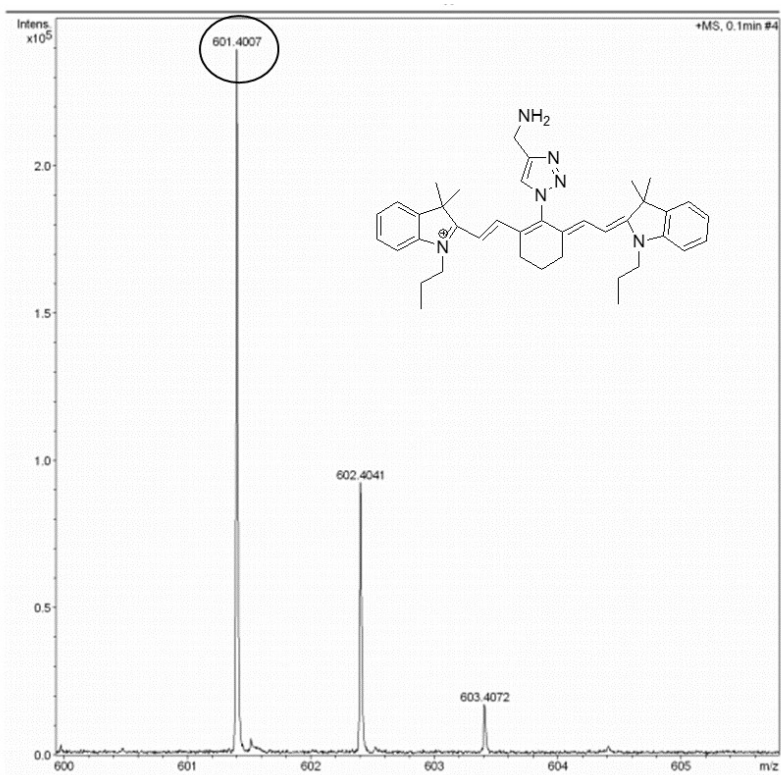

Figure S3. HR-MS of IR780-NT-NH<sub>2</sub>

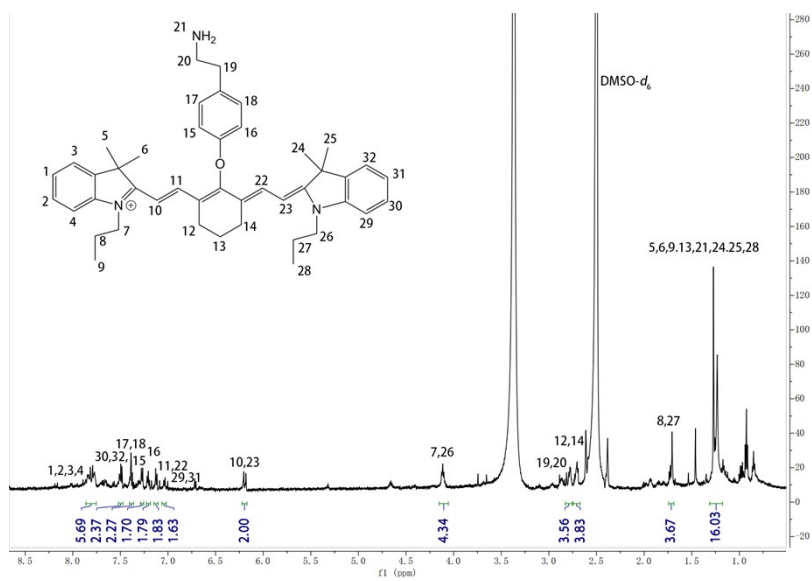

Figure S4. <sup>1</sup>H NMR of IR780-PO-NH<sub>2</sub>

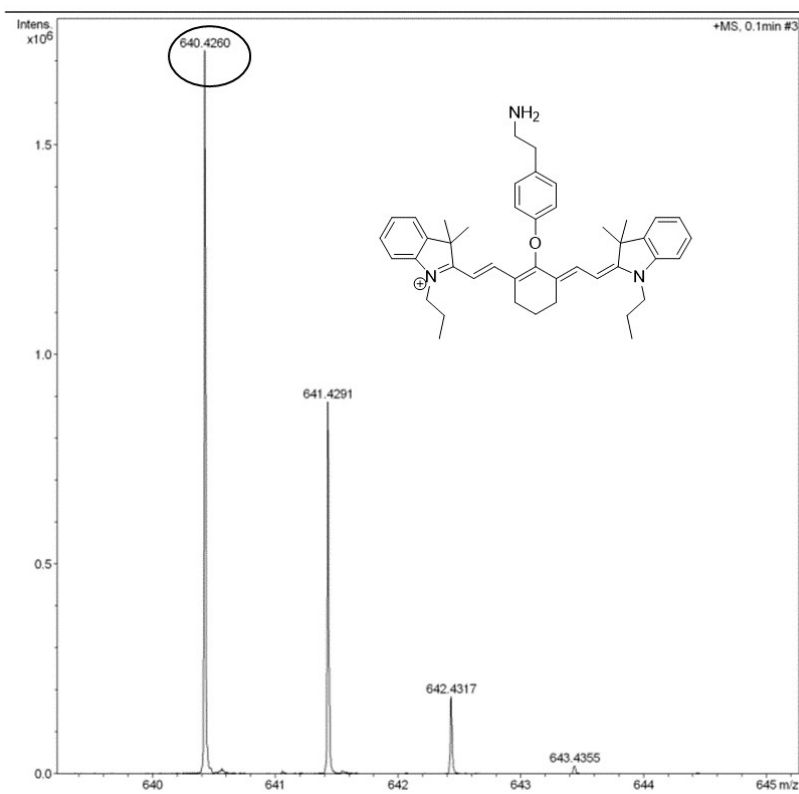

Figure S5. HR-MS of IR780-PO-NH<sub>2</sub>

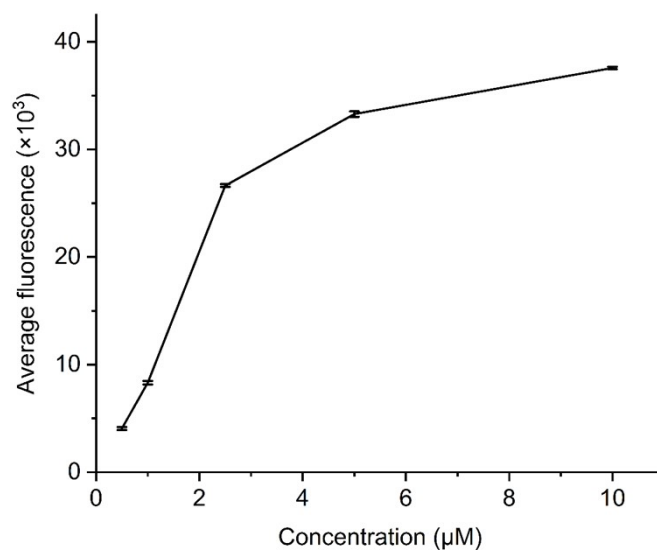

Figure S6. In vitro cellular uptake of IR780-NT-NH<sub>2</sub> in PC-3 cells with various concentrations (0.5, 1, 2.5, 5 and 10 µM).

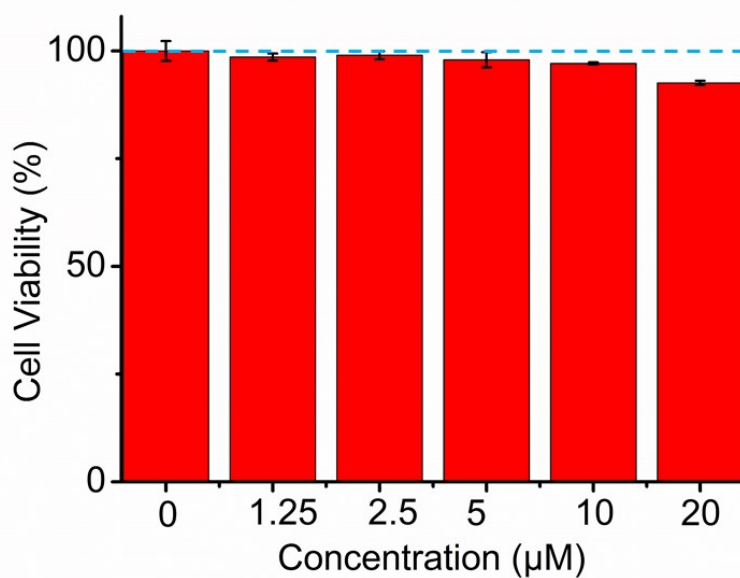

Figure S7. Cellular toxicity study of IR780-NT-NH<sub>2</sub> in PC-3 cells. Cells were seeded at a density of 5,000 cells per well in a 96-well plate. After 24 h, IR780-NT-NH<sub>2</sub> was added to each well with gradient concentrations (0, 1.25, 2.5, 5, 10, and 20 µmol/L) and incubated for 24 h at 37°C. The cell viability was tested by MTT assay. Error bars are for  $n = 5$ .

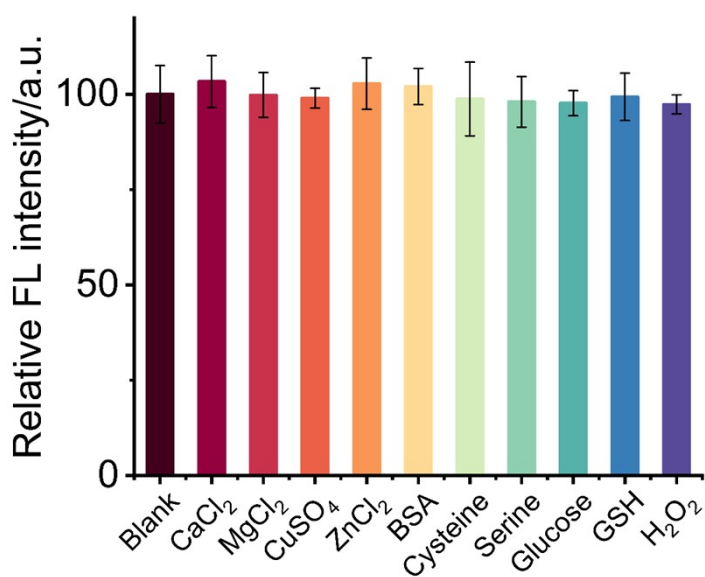

Figure S8. Relative fluorescence intensity of IR780-NT-NH<sub>2</sub> with various potential interfering species (CaCl<sub>2</sub> 2 mM, MgCl<sub>2</sub> 2 mM, CuSO<sub>4</sub> 50 μM, ZnCl<sub>2</sub> 100 μM, BSA 1 mg/mL, cysteine 1 mM, serine 1 mM, glucose 10 mM, GSH 100 μM, and H<sub>2</sub>O<sub>2</sub> 100 μM). The blank was set as no interfering species addition. The concentration of IR780-NT-NH<sub>2</sub> was 5 μM. Error bars represent the standard deviation ( $n = 3$ ).
